# Supplementary material for: Carbon-dot doped, transfer-free, low-temperature, high mobility graphene using microwave plasma CVD
Source: Royal Society of Chemistry journal article supplement (doi:10.1039/d2ra03274k), 2022-01-01
Supplement: d2ra03274k1.pdf [file d2ra03274k1.pdf]

## Supporting information

### Carbon-dots doped, Transfer-free, low-temperature, high mobility graphene using microwave plasma CVD

Ashmi Mewada<sup>1\*</sup>, Riteshkumar Vishwakarma<sup>1</sup>, Rucheng Zhu<sup>1</sup>, Masayoshi Umeno<sup>1</sup>

<sup>1</sup>C's Techno Inc., Co-operative Research Center for Advanced Technology,  
Nagoya Science Park, Moriyama-ku, Nagoya, Japan-4630003

\*Corresponding authors. E-mail: [ashmi15588@gmail.com](mailto:ashmi15588@gmail.com) (Ashmi Mewada),  
[umeno@cstechno.hope.cx](mailto:umeno@cstechno.hope.cx) (Masayoshi Umeno)

We have collected data of sheet resistance and mobility for the period of 30 days and graph shows that the electronic properties of graphene remain stable ( $398 \text{ cm}^2/\text{Vs}$ ) up to 30 days.

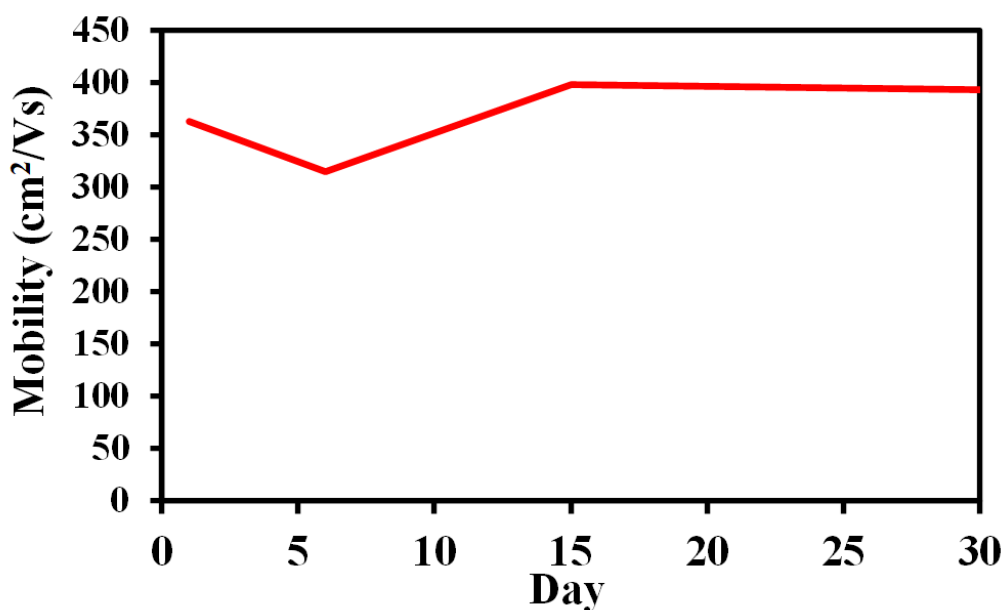

Fig S1 Mobility of graphene doped with c-dots dissolved in ethanol (measured for one-month)
